# Supplementary material for: Cobalt Chloride Enhances the Anti-Inflammatory Potency of Human Umbilical Cord Blood-Derived Mesenchymal Stem Cells through the ERK-HIF-1α-MicroRNA-146a-Mediated Signaling Pathway
Source: Hindawi journal article supplement (doi:10.1155/2018/4978763), 2018-09-05

Supp. Fig 1

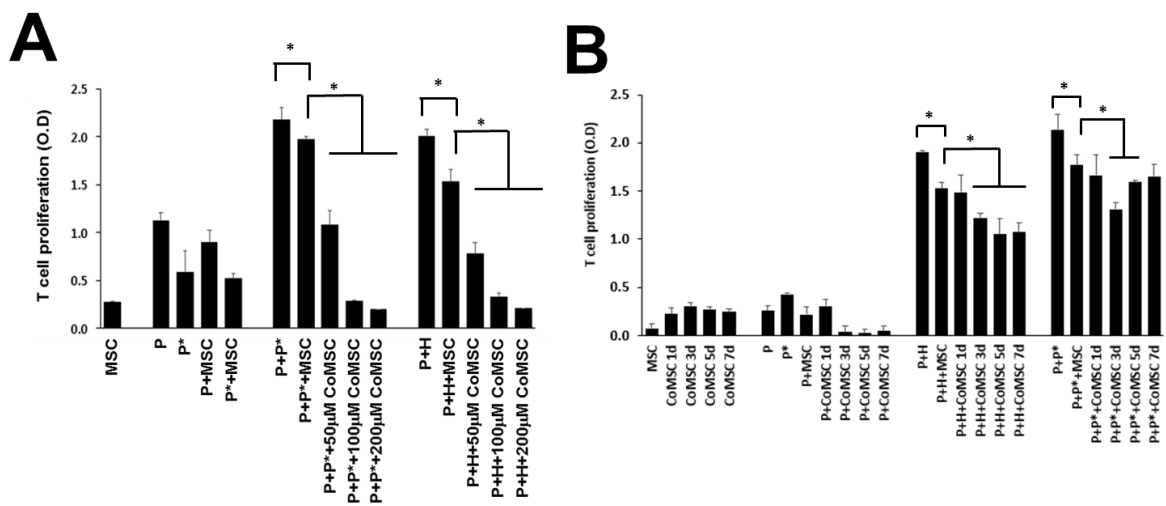

Supp. Fig 2

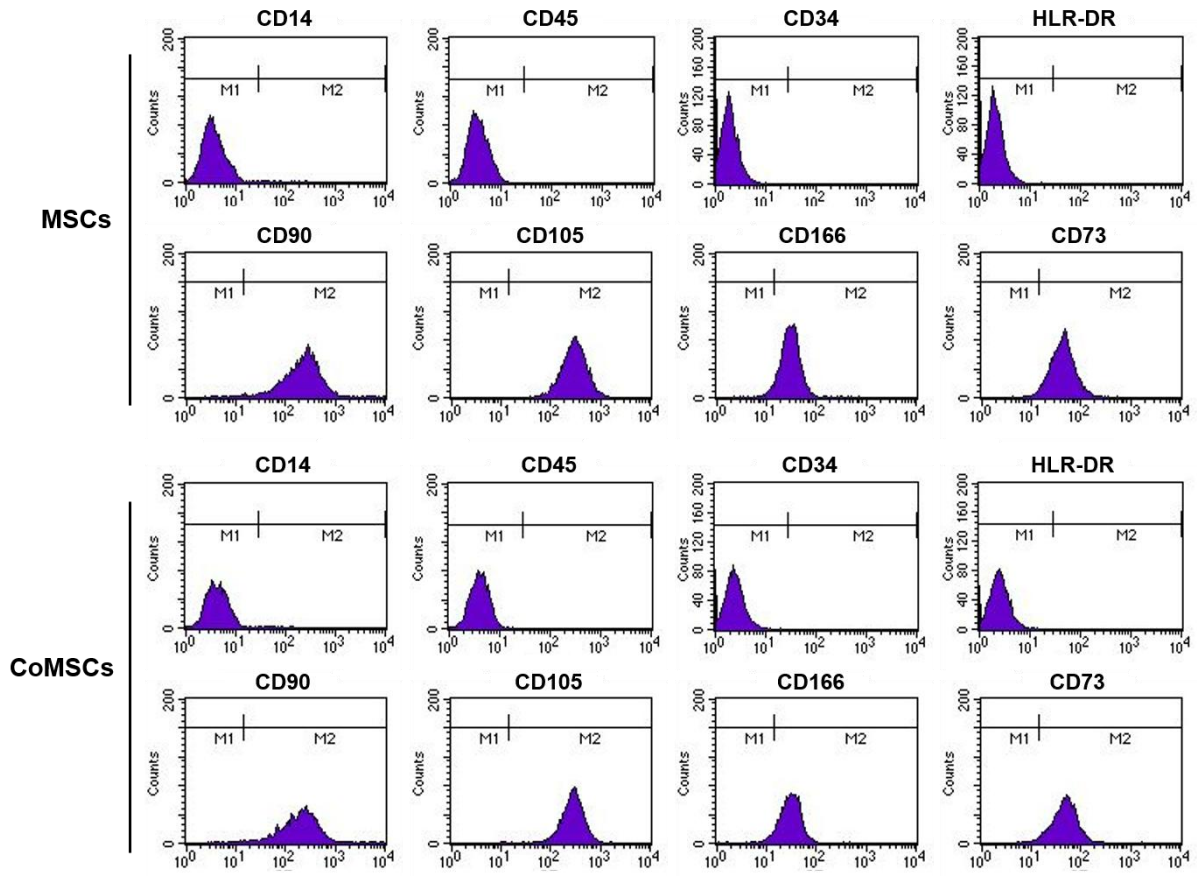

Supp. Fig 3

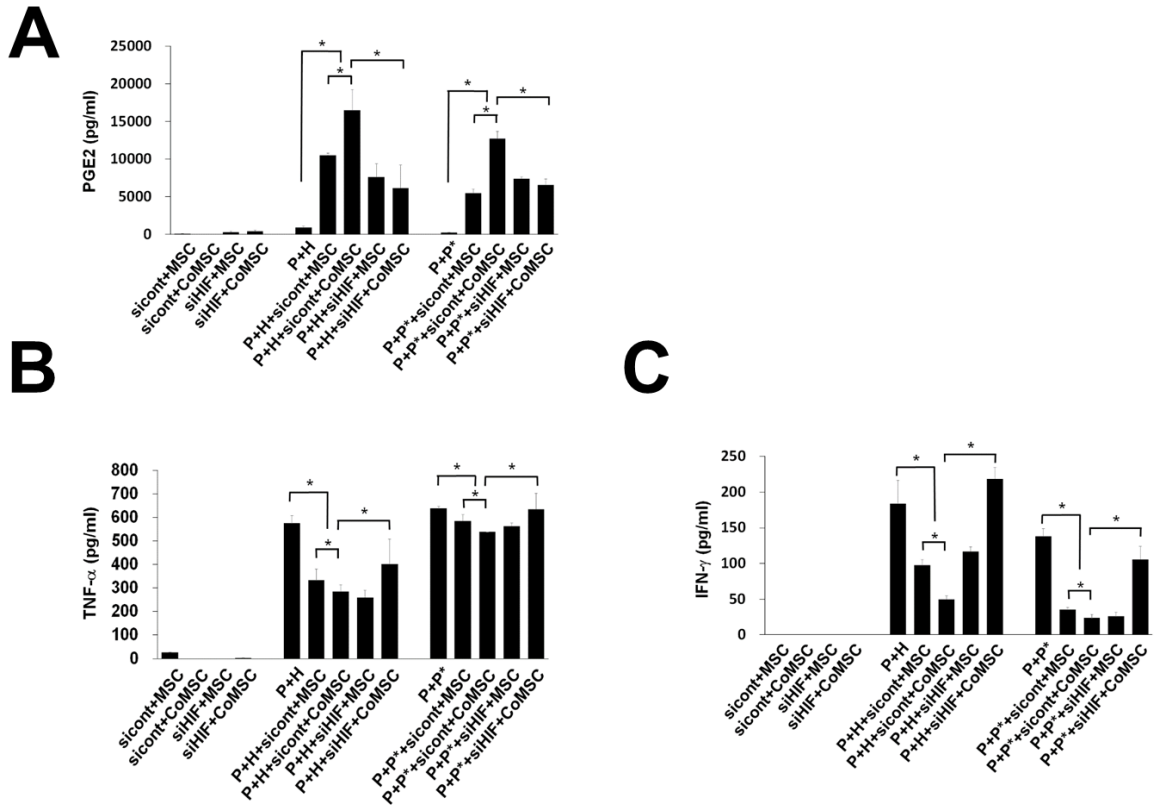

Supp. Fig 4

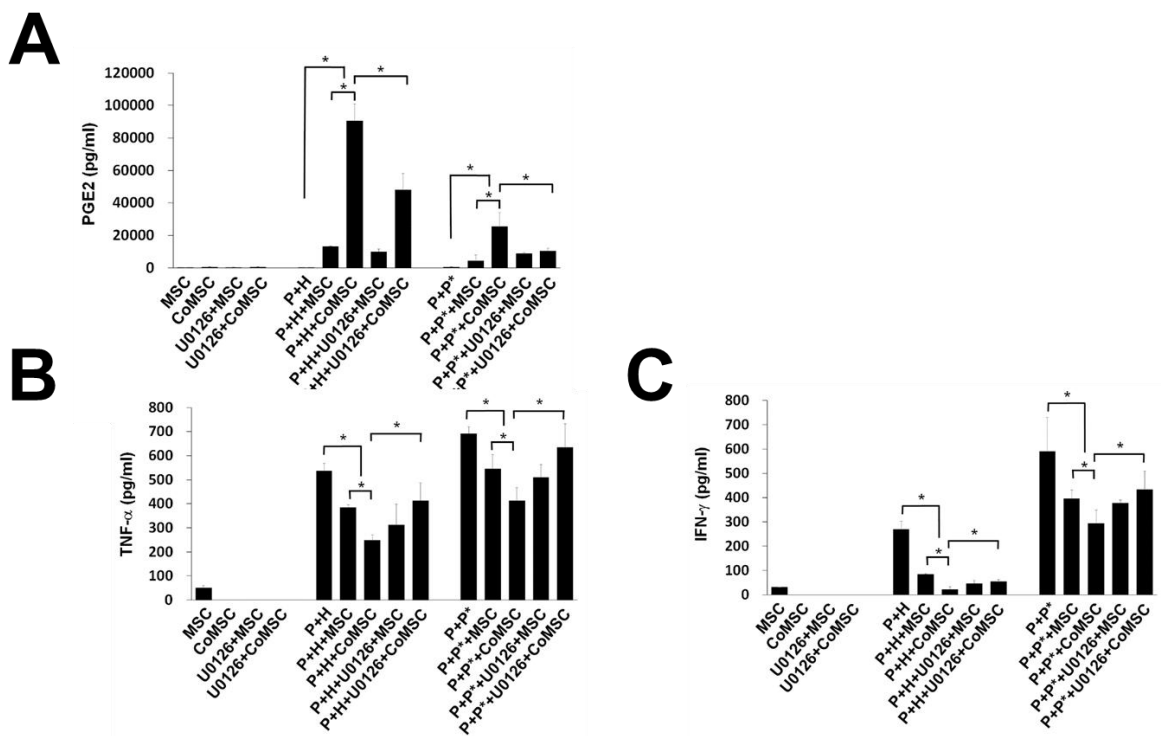

Supp. Fig 5

**A**

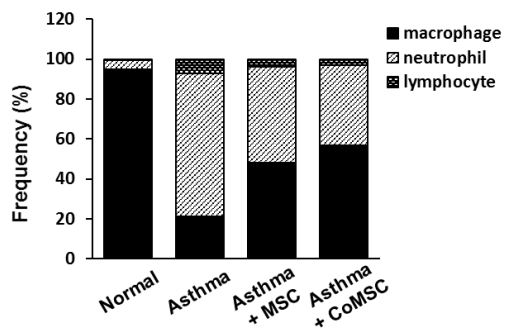

**B**

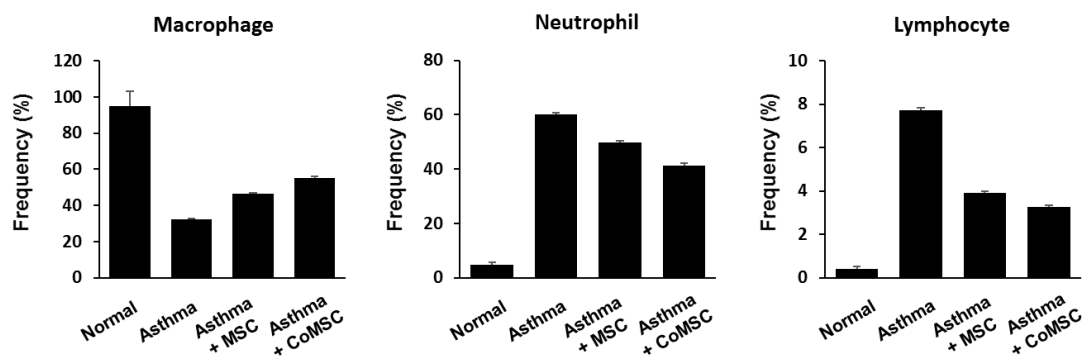

Supplement: f1 [file 4978763.f1.pdf]
